# Supplementary material
Source: PubMed Central journal article supplement (PMC4677966)
Supplement: supp_dev292_dev292supp_table1.pdf [file supp_dev292_dev292supp_table1.pdf]

**Supplementary Table S1** Number of urine samples collected in total study cohort (N = 215) and mean  $\sum$ DEHP ( $\mu\text{mol/l}$ ).

| Number of urine samples | Frequency (%) | Cumulative frequency (%) | Mean (SD) <sup>1</sup> $\sum$ DEHP ( $\mu\text{mol/l}$ ) |
|-------------------------|---------------|--------------------------|----------------------------------------------------------|
| 1                       | 131 (61%)     | 131 (61%)                | 0.66 (2.02)                                              |
| 2                       | 20 (9%)       | 151 (70%)                | 0.33 (0.31)                                              |
| 3                       | 24 (11%)      | 175 (81%)                | 0.38 (0.31)                                              |
| 4                       | 13 (6%)       | 188 (87%)                | 0.46 (0.35)                                              |
| 5                       | 10 (5%)       | 198 (92%)                | 0.26 (0.19)                                              |
| 6                       | 3 (1%)        | 201 (93%)                | 0.56 (0.07)                                              |
| 7                       | 8 (4%)        | 209 (97%)                | 0.31 (0.37)                                              |
| 8                       | 4 (2%)        | 213 (99%)                | 0.62 (0.40)                                              |
| 9                       | 1 (0.5%)      | 214 (99.5%)              | 0.06 (.)                                                 |
| 11                      | 1 (0.5%)      | 215 (100%)               | 0.97 (.)                                                 |

P-value (chi-square) = 0.10

<sup>1</sup>Geometric mean and standard deviation (SD) of  $\sum$ DEHP ( $\mu\text{mol/l}$ ).
