# Supplementary material
Source: PubMed Central journal article supplement (PMC4677966)
Supplement: supp_dev292_dev292supp_table2.pdf [file supp_dev292_dev292supp_table2.pdf]

**Supplementary Table SII Mean antral follicle count (AFC) by quartile of urinary  $\Sigma$ DEHP and DEHP metabolite concentrations stratified by age (<37 versus  $\geq$ 37) among 215 women with AFC measurements in the Environment and Reproductive Health Study (EARTH).**

| Metabolite                   | Mean AFC (95% CI)<br><37 years<br>(n = 118) <sup>1</sup> | Difference<br>in mean<br>AFC | % Change (95% CI) | P-value <sup>2</sup> | Mean AFC<br>(95% CI)<br>$\geq$ 37 years<br>(n = 97) <sup>1</sup> | Difference in<br>mean AFC | % Change (95% CI) | P-value |
|------------------------------|----------------------------------------------------------|------------------------------|-------------------|----------------------|------------------------------------------------------------------|---------------------------|-------------------|---------|
| $\Sigma$ DEHP ( $\mu$ mol/l) |                                                          |                              |                   |                      |                                                                  |                           |                   |         |
| Q1 (0.02–0.09)               | 15.8 (14.4, 17.4)                                        | 0 (ref)                      | –                 | –                    | 12.2 (10.9, 13.7)                                                | 0 (ref)                   | –                 | –       |
| Q2 (0.10–0.21)               | 11.9 (10.7, 13.2)                                        | –3.9                         | –25% (–35, –13)   | <0.0001              | 9.2 (8.1, 10.5)                                                  | –3.0                      | –25% (–36, –11)   | 0.001   |
| Q3 (0.21–0.44)               | 12.8 (11.5, 14.3)                                        | –3.0                         | –19% (–30, –6)    | 0.005                | 10.3 (9.2, 11.6)                                                 | –1.9                      | –16% (–28, –1)    | 0.04    |
| Q4 (0.46–18.9)               | 13.8 (12.6, 15.1)                                        | –2.0                         | –13% (–24, 0)     | 0.04                 | 10.3 (8.9, 11.9)                                                 | –1.9                      | –16% (–30, 1)     | 0.06    |
| MEHP ( $\mu$ g/l)            |                                                          |                              |                   |                      |                                                                  |                           |                   |         |
| Q1 (0.21–1.62)               | 16.6 (15.1, 18.4)                                        | 0 (ref)                      | –                 | –                    | 11.5 (10.4, 12.8)                                                | 0 (ref)                   | –                 | –       |
| Q2 (1.63–3.50)               | 13.2 (11.9, 14.7)                                        | –3.4                         | –20% (–31, –8)    | 0.002                | 10.5 (9.3, 11.9)                                                 | –1.0                      | –9% (–22, 7)      | 0.26    |
| Q3 (3.53–6.53)               | 11.3 (10.2, 12.5)                                        | –5.3                         | –32% (–41, –22)   | <0.001               | 9.1 (7.9, 10.5)                                                  | –2.4                      | –21% (–34, –5)    | 0.01    |
| Q4 (6.71–265)                | 13.9 (12.7, 15.2)                                        | –2.7                         | –17% (–27, –4)    | 0.009                | 10.6 (9.3, 12.2)                                                 | –0.9                      | –8% (–22, 10)     | 0.36    |
| MEHHP ( $\mu$ g/l)           |                                                          |                              |                   |                      |                                                                  |                           |                   |         |
| Q1 (1.00–7.50)               | 15.4 (14.0, 16.9)                                        | 0 (ref)                      | –                 | –                    | 11.2 (9.9, 12.6)                                                 | 0 (ref)                   | –                 | –       |
| Q2 (8.21–17.70)              | 12.4 (11.1, 13.8)                                        | –3.0                         | –20% (–30, –7)    | 0.003                | 10.5 (9.4, 11.8)                                                 | –1.0                      | –6% (–21, 11)     | 0.46    |
| Q3 (17.90–40.57)             | 12.9 (11.5, 14.4)                                        | –2.5                         | –16% (–28, –3)    | 0.02                 | 9.2 (8.2, 10.4)                                                  | –2.0                      | –18% (–31, –2)    | 0.03    |
| Q4 (41.10–1977)              | 13.5 (12.3, 14.7)                                        | –1.9                         | –12% (–23, 0)     | 0.05                 | 12.0 (10.4, 13.8)                                                | 0.8                       | 7% (–11, 29)      | 0.48    |
| MEOHP ( $\mu$ g/l)           |                                                          |                              |                   |                      |                                                                  |                           |                   |         |
| Q1 (0.94–5.10)               | 15.8 (14.4, 17.3)                                        | 0 (ref)                      | –                 | –                    | 11.8 (10.4, 13.2)                                                | 0 (ref)                   | –                 | –       |
| Q2 (5.14–11.12)              | 12.2 (10.8, 13.7)                                        | –3.6                         | –23% (–34, –10)   | 0.0009               | 10.4 (9.3, 11.6)                                                 | –1.4                      | –12% (–25, 4)     | 0.13    |
| Q3 (11.22–24.90)             | 12.9 (11.7, 14.3)                                        | –2.9                         | –18% (–28, –6)    | 0.004                | 9.7 (8.5, 11.0)                                                  | –2.1                      | –18% (–31, –2)    | 0.03    |
| Q4 (25.03–1278)              | 13.1 (12.0, 14.4)                                        | –2.7                         | –17% (–27, –5)    | 0.006                | 10.4 (9.0, 12.0)                                                 | –1.4                      | –12% (–27, 6)     | 0.19    |
| MECPP ( $\mu$ g/l)           |                                                          |                              |                   |                      |                                                                  |                           |                   |         |
| Q1 (3.17–13.40)              | 15.6 (14.1, 17.3)                                        | 0 (ref)                      | –                 | –                    | 12.0 (10.7, 13.4)                                                | 0 (ref)                   | –                 | –       |
| Q2 (13.50–29.34)             | 12.4 (11.2, 13.7)                                        | –3.2                         | –21% (–32, –9)    | 0.001                | 9.4 (8.2, 10.7)                                                  | –2.6                      | –22% (–34, –7)    | 0.006   |
| Q3 (29.63–58.45)             | 13.3 (12.0, 14.7)                                        | –2.3                         | –15% (–27, –2)    | 0.02                 | 10.7 (9.5, 12.0)                                                 | –1.3                      | –11% (–24, 5)     | 0.17    |
| Q4 (59.10–2109)              | 13.4 (12.2, 14.7)                                        | –2.2                         | –15% (–26, –2)    | 0.03                 | 9.7 (8.4, 11.2)                                                  | –2.3                      | –19% (–32, –3)    | 0.03    |

<sup>1</sup>Poisson regression models, adjusted for age (continuous), BMI (continuous) and smoking status (never, ever).

<sup>2</sup>P-value is for test of significant difference between the quartile of interest and quartile 1.
