# Supplementary material
Source: PubMed Central journal article supplement (PMC4677966)
Supplement: supp_dev292_dev292supp_table3.pdf [file supp_dev292_dev292supp_table3.pdf]

**Supplementary Table SIII Risk ratios (RR) and 95% confidence intervals (CI) for decreased ovarian reserve (AFC ≤8) by quartile of urinary  $\Sigma$ DEHP and DEHP metabolite concentrations, Total sample and stratified by age (<37 and ≥37 years).**

| Metabolite quartile                 | RR (95% CI) <sup>1</sup><br>Total sample<br>(N = 215) | RR (95% CI) <sup>2</sup><br><37 years<br>(N = 118) | RR (95% CI) <sup>2</sup><br>≥37 years<br>(N = 97) |
|-------------------------------------|-------------------------------------------------------|----------------------------------------------------|---------------------------------------------------|
| $\Sigma$ DEHP ( $\mu\text{mol/l}$ ) |                                                       |                                                    |                                                   |
| Q1 (0.02–0.09)                      | Ref                                                   | Ref                                                | Ref                                               |
| Q2 (0.10–0.21)                      | 1.63 (1.00–2.64) <sup>3</sup>                         | 3.48 (1.09–11.12) <sup>3</sup>                     | 1.13 (0.64–1.99)                                  |
| Q3 (0.21–0.44)                      | 1.09 (0.64–1.84)                                      | 1.77 (0.47–6.67)                                   | 1.00 (0.56–1.76)                                  |
| Q4 (0.46–18.9)                      | 1.18 (0.68–2.07)                                      | 1.81 (0.51–6.43)                                   | 1.06 (0.58–1.95)                                  |
| MEHP ( $\mu\text{g/l}$ )            |                                                       |                                                    |                                                   |
| Q1 (0.21–1.62)                      | Ref                                                   | Ref                                                | Ref                                               |
| Q2 (1.63–3.50)                      | 1.26 (0.74–2.13)                                      | 3.25 (0.74–14.34)                                  | 1.20 (0.70–2.07)                                  |
| Q3 (3.53–6.53)                      | 1.18 (0.70–2.00)                                      | 4.29 (1.05–17.48) <sup>3</sup>                     | 0.95 (0.50–1.77)                                  |
| Q4 (6.71–265)                       | 1.07 (0.60–1.90)                                      | 2.33 (0.51–10.61)                                  | 1.00 (0.55–1.81)                                  |
| MEHHP ( $\mu\text{g/l}$ )           |                                                       |                                                    |                                                   |
| Q1 (1.00–7.50)                      | Ref                                                   | Ref                                                | Ref                                               |
| Q2 (8.21–17.70)                     | 1.30 (0.78–2.14)                                      | 2.37 (0.82–6.85)                                   | 0.92 (0.52–1.64)                                  |
| Q3 (17.90–40.57)                    | 1.15 (0.71–1.86)                                      | 1.65 (0.52–5.23)                                   | 1.05 (0.62–1.78)                                  |
| Q4 (41.10–1977)                     | 1.00 (0.56–1.78)                                      | 1.65 (0.54–4.99)                                   | 0.83 (0.41–1.65)                                  |
| MEOHP ( $\mu\text{g/l}$ )           |                                                       |                                                    |                                                   |
| Q1 (0.94–5.10)                      | Ref                                                   | Ref                                                | Ref                                               |
| Q2 (5.14–11.12)                     | 1.50 (0.89–2.54)                                      | 3.22 (0.94–11.02)                                  | 1.07 (0.60–1.90)                                  |
| Q3 (11.22–24.90)                    | 1.43 (0.84–2.44)                                      | 2.50 (0.73–8.58)                                   | 1.20 (0.67–2.16)                                  |
| Q4 (25.03–1278)                     | 1.16 (0.67–2.01)                                      | 2.31 (0.67–8.00)                                   | 0.99 (0.52–1.88)                                  |
| MECPP ( $\mu\text{g/l}$ )           |                                                       |                                                    |                                                   |
| Q1 (3.17–13.40)                     | Ref                                                   | Ref                                                | Ref                                               |
| Q2 (13.50–29.34)                    | 1.75 (1.05–2.92) <sup>3</sup>                         | 2.90 (0.88–9.57)                                   | 1.39 (0.77–2.49)                                  |
| Q3 (29.63–58.45)                    | 1.12 (0.65–1.95)                                      | 1.49 (0.39–5.61)                                   | 1.17 (0.63–2.15)                                  |
| Q4 (59.10–2109)                     | 1.40 (0.80–2.46)                                      | 2.12 (0.61–7.35)                                   | 1.24 (0.66–2.32)                                  |

<sup>1</sup>Log-binomial risk ratios (RR) and 95% confidence intervals (CI), adjusted for age (continuous), BMI (continuous) and smoking status (never/ever).

<sup>2</sup>Log-binomial risk ratios and 95% CI, adjusted for BMI (continuous) and smoking status (never, ever).

<sup>3</sup>Result is statistically different from the reference group.
